# Supplementary material for: Characterization of VPS34-IN1, a selective inhibitor of Vps34, reveals that the phosphatidylinositol 3-phosphate-binding SGK3 protein kinase is a downstream target of class III phosphoinositide 3-kinase
Source: PubMed Central journal article supplement (PMC4209782; doi:10.1042/bj20140889), 2014-10-10
Supplement: bj4630413ntsadd.pdf [file bj4630413ntsadd.pdf]

## Supplementary Figure Legends

**Figure S1** **IC<sub>50</sub> analysis of ability of VPS34-IN1 to inhibit Vps34 kinase employing Life Technology assay.** (A) Recombinant human Vps34 was assayed by measuring phosphorylation of PtdIns in a <sup>32</sup>P-radioactive kinase assay by Selectscreen biochemical kinase profiling service at Life technology. The assay conditions are described at [www.lifetechnologies.com/selectscreen](http://www.lifetechnologies.com/selectscreen). IC<sub>50</sub> graph was generated using prism software with non-linear regression analysis. Assays were undertaken in duplicates and data presented as mean ± SD and activity plotted relative to 100% activity in DMSO control.

**Figure S2** Protein kinase profiling of the VPS34-IN1 at a single concentration of 1µM carried out against the ProKinase panel of 300 protein kinases. Results for each kinase are presented as the mean kinase activity ± SD for an assay undertaken in triplicate relative to a Control kinase assay in which inhibitor was omitted. Abbreviation used for each kinase and assay conditions utilised are defined at the (<http://www.proqinase.com>)

**Figure S3** **IC<sub>50</sub> analysis of ability of VPS34-IN1 to inhibit lipid kinases employing ProKinase screen technology.** IC<sub>50</sub> graphs for PIK3C3, PIP5K1A and PIP5K1C were generated using Prism software with non-linear regression analysis. Abbreviation used for each kinase and assay conditions utilised are defined at the (<http://www.proqinase.com>)

### **Table S1**

Results are presented as the percentage of kinase activity in DMSO control reactions. Protein kinases were assayed *in vitro* in the presence of 1µM VPS34-IN1 inhibitor as described on the International Centre for Kinase Profiling website (<http://www.kinase-screen.mrc.ac.uk/>), and the results are means ± S.D. for triplicate reactions. Abbreviations are as follows: ABL, Abelson tyrosine-protein kinase 1; AMPK, AMP-activated protein kinase; ASK, apoptosis signal-regulating kinase; BRK, breast tumour kinase; BRSK, brain-specific kinase; BTK, Bruton's tyrosine kinase; CaMK, calmodulin-dependent kinase; CaMKK, CaMK kinase; CDK, cyclin-dependent kinase; CHK, checkpoint kinase; CK, casein kinase; CLK, CDC-like kinase; CSK, C-terminal Src kinase; DAPK, death-associated protein kinase; DDR, discoidin domain receptor; DYRK, dual-specificity tyrosine-phosphorylated and regulated kinase; EF2K, elongation-factor-2 kinase; EIF2AK, eukaryotic translation initiation factor 2-alpha kinase; EPH, ephrin; ERK, extracellular signal-regulated kinase; FGF-R, fibroblast growth factor receptor; GSK, germinal centre kinase; GSK, glycogen synthase kinase; HER, human epidermal growth factor receptor; HIPK, homeodomain-interacting protein kinase; IGF1R, IGF1 receptor; IKK, inhibitory κB kinase; IR, insulin receptor; IRAK, interleukin-1 receptor-associated kinase; IRR, insulin-related receptor; JAK, Janus kinase; JNK, c-Jun N-terminal kinase; Lck, lymphocyte cell-specific protein tyrosine kinase; LKB1, liver kinase B1; MAPK, mitogen-activated protein kinase; MAPKAP-K, MAPK-activated protein kinase; MARK, microtubule-affinityregulating kinase; MEKK, MAP kinase kinase kinase; MELK, maternal

embryonic leucine zipper kinase; MINK, misshapen/NIK-related kinase; MKK, MAPK kinase; MLK, mixed lineage kinase; MNK, MAPK-integrating protein kinase; MPSK, myristoylated and palmitoylated serine/threonine-protein kinase; MSK, mitogen- and stress-activated protein kinase; MST, mammalian homologue Ste20-like kinase; NEK, NIMA (never in mitosis in *Aspergillus nidulans*)-related kinase; NUAK, novel (NUA) family SnF1-like kinase; OSR, oxidative stress-responsive kinase; PAK, p21-activated protein kinase; PDGFRA, platelet-derived growth factor receptor- $\alpha$ ; PDK, phosphoinositide-dependent kinase; PHK, phosphorylase kinase; PIM, provirus integration site for Moloney murine leukaemia virus; PINK (insect homologue), PTEN-induced kinase; PKA, cAMP-dependent protein kinase; PKB, protein kinase B; PKC, protein kinase C; PKD, protein kinase D; PLK, polo-like kinase; PRAK, p38-regulated activated kinase; PRK, protein kinase C-related kinase; RIPK, receptor-interacting protein kinase; ROCK, Rho-dependent protein kinase; RSK, ribosomal S6 kinase; S6K, p70 ribosomal S6 kinase; SGK, serum- and glucocorticoid-induced protein kinase; SIK, salt-induced kinase; smMLCK, smooth muscle myosin light-chain kinase; SRPK, serine/arginine protein kinase; STK, serine/threonine kinase; SYK, spleen tyrosine kinase; TAK, TGF $\beta$ -activated kinase; TAO, thousand and one amino acid; TBK1, TANK-binding kinase 1; TESK, testis-specific protein kinase; TGFBR, TGF $\beta$  receptor; TIE, tyrosine-protein kinase receptor; TLK, tousled-like kinase; TrkA, tropomyocin receptor kinase; TSSK, testis-specific serine/threonine-protein kinase; TTBK, tau-tubulin kinase; ULK, Unc-51-like kinase; VEGFR, vascular endothelial growth factor receptor; WNK, with no lysine; YES1, Yamaguchi sarcoma viral oncogene homologue 1; ZAP,  $\zeta$ -chain-associated protein.

FIGURE S1

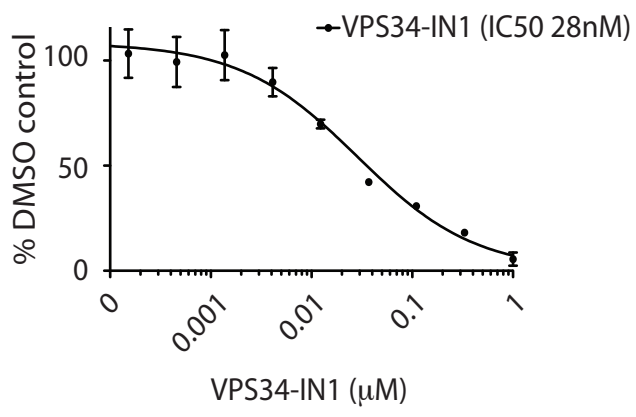

FIGURE S2

VPS34-IN1, 1 $\mu$ M (ProQinase panel)

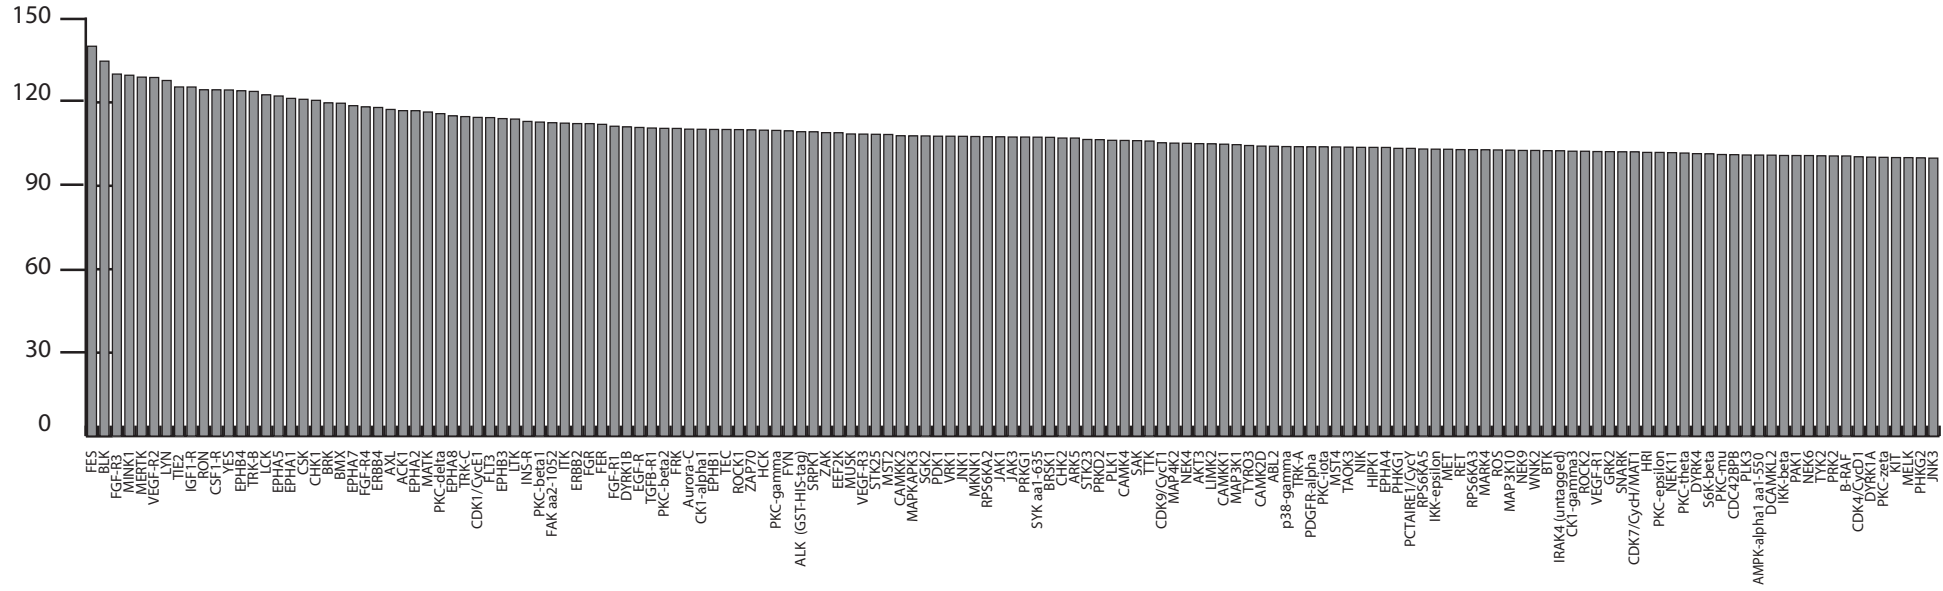

VPS34-IN1, 1 $\mu$ M (ProQinase panel)

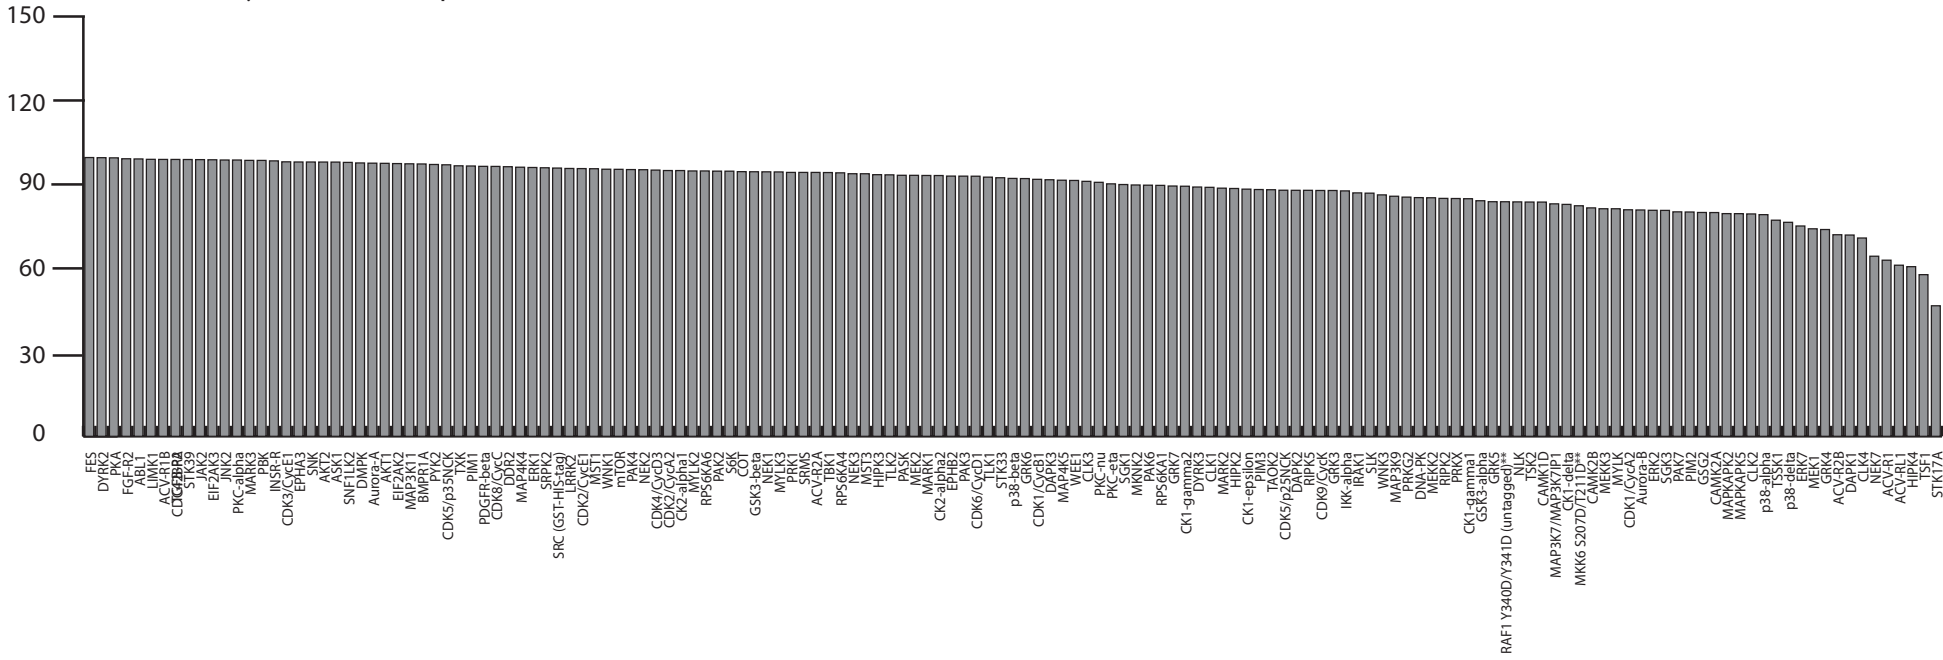

FIGURE S3

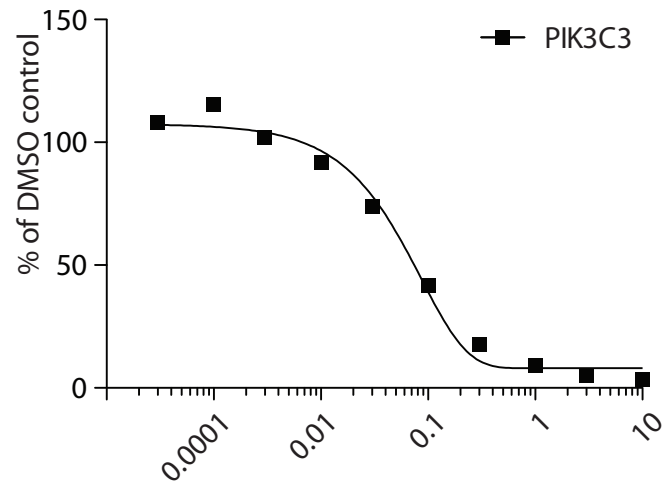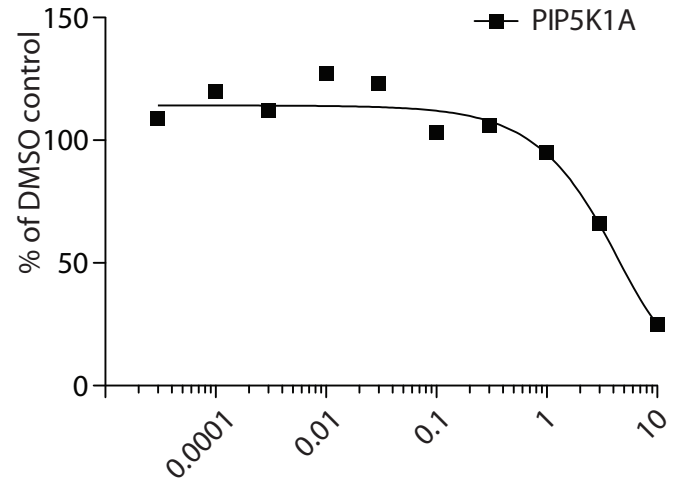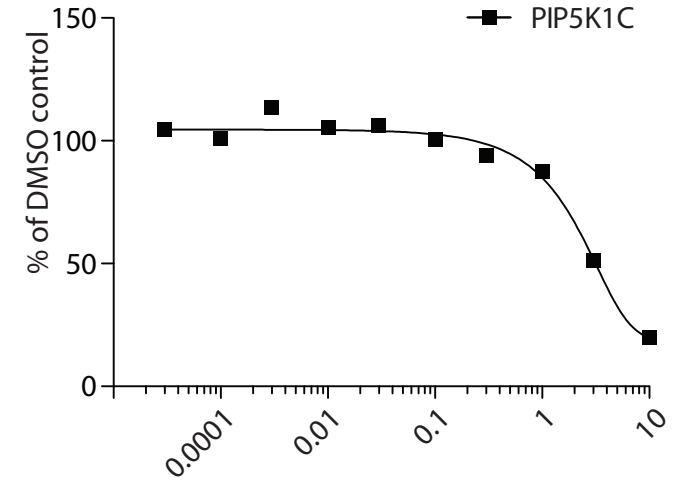

Table S1

|           |     |           |     |                |     |
|-----------|-----|-----------|-----|----------------|-----|
| p38g MAPK | 133 | NUAK1     | 112 | PAK4           | 103 |
| IRAK4     | 133 | DYRK3     | 112 | RSK2           | 103 |
| CSK       | 132 | SIK3      | 112 | PKCz           | 103 |
| MLK3      | 129 | JNK1      | 112 | CHK2           | 103 |
| TBK1      | 125 | p38d MAPK | 111 | NEK2a          | 103 |
| p38a MAPK | 125 | MKK2      | 111 | MINK1          | 103 |
| EIF2AK3   | 125 | EPH-B3    | 111 | IKKe           | 103 |
| ASK1      | 124 | ROCK 2    | 111 | BRK            | 103 |
| MKK6      | 124 | CK2       | 111 | IGF-1R         | 101 |
| STK33     | 124 | SRPK1     | 111 | EPH-A2         | 101 |
| PKBb      | 123 | DDR2      | 111 | HER4           | 101 |
| TGFBR1    | 123 | PAK2      | 111 | MNK2           | 100 |
| MNK1      | 122 | PKCy      | 111 | TLK1           | 100 |
| CK1γ2     | 122 | MAPKAP-K2 | 110 | RSK1           | 99  |
| MKK1      | 122 | Aurora A  | 110 | EPH-B1         | 99  |
| PDGFRA    | 121 | ZAP70     | 110 | NEK6           | 98  |
| MST2      | 120 | IR        | 109 | ULK1           | 98  |
| MLK1      | 119 | MEKK1     | 109 | BRSK2          | 98  |
| PKCa      | 119 | PINK      | 109 | SmMLCK         | 97  |
| MST3      | 118 | MARK3     | 109 | PAK6           | 97  |
| ULK2      | 118 | DYRK2     | 109 | AMPK (hum)     | 96  |
| MPSK1     | 118 | EPH-B2    | 109 | PAK5           | 96  |
| TSSK1     | 118 | BRSK1     | 109 | DAPK1          | 96  |
| CHK1      | 118 | PIM1      | 108 | HIPK2          | 96  |
| HIPK3     | 117 | TTK       | 108 | JNK3           | 95  |
| MAP4K3    | 117 | CAMKKb    | 108 | FGF-R1         | 95  |
| PRK2      | 116 | BTK       | 108 | TESK1          | 95  |
| CAMK1     | 116 | MELK      | 108 | TIE2           | 93  |
| WNK1      | 116 | MARK2     | 108 | EPH-A4         | 93  |
| S6K1      | 116 | HIPK1     | 108 | JAK2           | 93  |
| PKBa      | 116 | SGK1      | 108 | Lck            | 92  |
| ERK2      | 116 | ERK1      | 108 | SYK            | 91  |
| MAPKAP-K3 | 115 | MST4      | 108 | CDK9-Cyclin T1 | 91  |
| EF2K      | 115 | LKB1      | 106 | TTBK2          | 88  |
| p38b MAPK | 115 | EPH-B4    | 106 | CDK2-Cyclin A  | 88  |
| MARK4     | 115 | IKKb      | 106 | ABL            | 87  |
| PKD1      | 115 | SIK2      | 106 | Src            | 84  |
| MARK1     | 114 | TTBK1     | 106 | Aurora B       | 83  |
| PLK1      | 114 | MAP4K5    | 105 | CLK2           | 82  |
| OSR1      | 114 | PDK1      | 105 | TAO1           | 80  |
| PIM3      | 114 | DYRK1A    | 105 | RIPK2          | 79  |
| JNK2      | 113 | CK1δ      | 105 | YES1           | 77  |
| PIM2      | 113 | MSK1      | 105 | TrkA           | 70  |
| VEG-FR    | 113 | PHK       | 105 | GSK3b          | 51  |
| IRR       | 113 | PRAK      | 105 | TAK1           | 40  |
| IRAK1     | 112 | ERK5      | 104 | ERK8           | 36  |
| PKA       | 112 | GCK       | 104 |                |     |
